1 Indication of spatially random infection of chlamydia-like organisms in *Bufo bufo*  
2 tadpoles from ponds located in the Geneva metropolitan area

3

4 Elia Vajana<sup>1\*</sup>, Ivo Widmer<sup>1,2\*</sup>, Estelle Rochat<sup>1</sup>, Solange Duruz<sup>1</sup>, Oliver Selmoni<sup>1</sup>, Séverine  
5 Vuilleumier<sup>3</sup>, Sébastien Aeby<sup>4</sup>, Gilbert Greub<sup>4†</sup>, Stéphane Joost<sup>1,5,6#†</sup>

6 <sup>1</sup> Laboratory of Geographic Information Systems (LASIG), School of Architecture, Civil and  
7 Environmental Engineering (ENAC), École Polytechnique Fédérale de Lausanne (EPFL), Lausanne,  
8 Switzerland

9 <sup>2</sup> Forum Biodiversity Switzerland (SCNAT), Berne, Switzerland

10 <sup>3</sup> La Source, School of Nursing, University of Applied Sciences and Arts Western Switzerland (HES-  
11 SO), Lausanne, Switzerland

12 <sup>4</sup> Institute of Microbiology, Lausanne University Hospital (CHUV) and University of Lausanne  
13 (UNIL), Lausanne, Switzerland

14 <sup>5</sup> Unit of Population Epidemiology, Division of Primary Care Medicine, Department of Community  
15 Medicine, Primary Care and Emergency Medicine, Geneva University Hospitals

16 <sup>6</sup> Institute of Social and Preventive Medicine (IUMSP), Division of chronic diseases (dMC), Lausanne  
17 University Hospital (CHUV), Lausanne, Switzerland

18 **Running Head:** Chlamydia-like organisms on *Bufo bufo*

19 # Corresponding author: S. Joost, Ph.D, Laboratory of Geographic Information Systems (LASIG),  
20 School of Architecture, Civil and Environmental Engineering (ENAC), École Polytechnique Fédérale  
21 de Lausanne (EPFL), Lausanne, Switzerland

22 Email: [stephane.joost@epfl.ch](mailto:stephane.joost@epfl.ch)

23 \*These authors contributed equally to this work and are considered co-first authors.

24 † Co-senior authors

## 25 **Abstract**

26 Occurrence of bacteria belonging to the order *Chlamydiales* was investigated for the first time  
27 in common toad (*Bufo bufo*) tadpole populations collected from 41 ponds in the Geneva metropolitan  
28 area, Switzerland. A *Chlamydiales*-specific Real-Time PCR was used to detect and amplify the  
29 *Chlamydiales* 16S rRNA-encoding gene from the tails of 375 tadpoles. We found the studied  
30 amphibian populations to be infected by “Chlamydia-like organisms” (CLOs) attributable to the genera  
31 *Similichlamydia*, *Neochlamydia*, *Protochlamydia* and *Parachlamydia* (belonging to the family  
32 *Parachlamydiaceae*), *Simkania* (family *Simkaniaceae*) and *Estrella* (family *Criblamydiaceae*);  
33 additionally, DNA from the genus *Thermoanaerobacter* (family *Thermoanaerobacteriaceae*) was  
34 detected. A global autocorrelation analysis did not reveal a spatial structure in the observed CLOs  
35 infection rates, and association tests involving land cover characteristics did not evidence any clear  
36 effect on CLOs infection rates in *B. bufo*. Despite preliminary, these results suggest a random and  
37 ubiquitous distribution of CLOs in the environment, which would support the biogeographical  
38 expectation “everything is everywhere” for the concerned microorganisms and their amoeba vectors.

## 39 **Keywords**

40 *Bufo bufo*, *Chlamydiales*, chlamydia-like organisms, chlamydia-related bacteria, emerging pathogens,  
41 intracellular bacteria, free-living amoebae, global spatial autocorrelation, hierarchical clustering, group  
42 comparison analysis, beta regression, public health, Geneva urban area.

## 43 **Introduction**

44 The order *Chlamydiales* consists of strict intracellular bacteria that replicate within eukaryotic  
45 cells of several animal hosts, among which humans [1]. Current molecular evidence suggests the

46 existence of two main lineages within *Chlamydiales*, which possibly diverged between 700 and 1400  
47 million years ago from the last common ancestor [2]: the family *Chlamydiaceae*, and the “chlamydia-  
48 like organisms” (CLOs) belonging to the families *Piscichlamydiaceae*, *Clavichlamydiaceae*,  
49 *Simkaniaceae*, *Rhabdochlamydiaceae*, *Waddliaceae*, *Parachlamydiaceae*, *Criblamydiaceae*, and  
50 *Parilichlamydiaceae* [1,3,4].

51 *Chlamydiaceae* were first described in the sixties, and since then they were discovered to cause  
52 a wide variety of diseases affecting over 400 documented animal species [1,5,6]. Among the most  
53 eminent representatives of the family are (i) *Chlamydia trachomatis*, the etiological agent of the human  
54 visually-impairing trachoma [1], (ii) *C. psittaci*, responsible for pneumonia and hepatitis in birds [6], as  
55 well as zoonotic lung infections in humans [7] and equine infections [8], (iii) *C. abortus* causing  
56 abortion in sheep, goats, cattle and swine, and with proved transferability to humans [6,9], and (iv) *C.*  
57 *pneumoniae*, responsible for respiratory infections and atherosclerosis in humans, rhinitis in koalas and  
58 horses, and conjunctivitis in reptiles [1,3,6]. Notably, *C. pneumoniae* was also reported to infect  
59 amphibian populations of African clawed frogs (*Xenopus tropicalis*), great barred frogs (*Mixophyes*  
60 *iteratus*), blue mountains tree frogs (*Litoria citropa*), and common frogs (*Rana temporaria*), which  
61 were also positive for *C. abortus* and *C. suis* [10–12]; furthermore, the Candidatus *Amphibiichlamydia*  
62 *ranarum* was found at high prevalence in invasive bullfrog populations, and is considered an emerging  
63 pathogen possibly contributing to the current amphibian biodiversity crisis [13].

64 CLOs discovery is more recent, and dates back to the end of the eighties, when *Waddlia*  
65 *chondrophila* was first isolated from an aborted bovine foetus [1,3]. As exhaustively reviewed [3,6,14],  
66 most research has focused on identifying emerging pathogens among CLOs, with *W. chondrophila*  
67 being suspected to trigger human miscarriage [15] and ruminant abortion [16,17], *Parachlamydia*  
68 *acanthamoebae* human miscarriage [18], *Simkaniaceae*, *Parachlamydiaceae* and

69 *Rhabdochlamydiaceae* respiratory diseases in humans and cattle [19–22], ocular infections in cats [23]  
70 and granulomatous inflammation in reptiles [24], *Parachlamydia* species to concur in the massive  
71 mortality events affecting an highly endangered midwife toad (*Alytes obstetricans*) population [25],  
72 and bacteria belonging to *Clavichlamydiaceae*, *Parachlamydiaceae*, *Parilichlamydiaceae*,  
73 *Piscichlamydiaceae*, *Rhabdochlamydiaceae*, and *Simkaniaceae* having a recognized role in  
74 epitheliocystis, a common gill disease in fish [3,26,27].

75 CLOs are also misnamed “environmental chlamydiae”, as the majority of them were first  
76 isolated from heterogeneous environmental sources spanning from water to soil [3,28,29]. Notably,  
77 CLOs belonging to *Parachlamydiaceae*, *Simkaniaceae*, *Criblamydiaceae* and *Waddliaceae* have been  
78 repeatedly observed as obligate endosymbionts of free-living amoebae species of the genera  
79 *Acanthamoeba* and *Hartmanella* [5,10,29–31], which are therefore expected to play a central role in  
80 guaranteeing CLOs survival and dispersal in the environment, as well as infections in new hosts [32].  
81 Possibly reflecting the high ecological tolerance and dispersal capabilities of such vectors (which can  
82 eventually rely on insects and wind to disperse over long distances), CLOs have been isolated from  
83 several ecosystems, and are commonly considered ubiquitous in the environment [1,3,26,33,34], with a  
84 highly diversified set of hosts including humans, marsupials and small mammals like the fruit bat,  
85 reptiles like chelonians, lizards and snakes, fish species like the Leafy sea dragon, the Blue-striped  
86 snapper, the Atlantic salmon, and the African catfish, as well as crustaceans like the Rough woodlouse  
87 [1,3,9,24,26].

88 However, biogeographical and ecological studies have been conducted to elucidate possible  
89 links between environmental conditions and composition of protozoa communities and distributions,  
90 leading to reject the paradigm “everything is everywhere, but, the environment selects” associated with  
91 free-living protozoa in some species (see the cases of *Nebela vas* and *Badhamia melanospora*) [35,36].

92 Particularly, local trends in precipitation [37] and soil characteristics related to moisture, temperature,  
93 pH, dissolved oxygen, and land cover (especially in terms of bryophyte species occurring in the crust)  
94 showed association with some testate [38–40] and protosteloid amoebae [37] occurrence. Such  
95 evidences would suggest – or at least do not exclude – a possible and still largely unexplored  
96 environmental influence on CLOs vectors and their endosymbionts at a local geographical scale.

97 In the present work, we investigated the occurrence of CLOs infection in the widespread  
98 common toad (*Bufo bufo*) for the first time, and tested the “everything is everywhere, but, the  
99 environment selects” principle with the observed infection patterns [41,42]. Particularly, we first tested  
100 *B. bufo* tadpole populations from the Geneva metropolitan area (Switzerland) for infection, and then the  
101 resulting infection rates for random distribution and association with land cover characteristics. In a  
102 public health perspective, we also derived human population density around sampling sites and studied  
103 a possible relationship with *B. bufo* infection, given the CLOs ability to infect humans from  
104 environment [3,21,43].

## 105 **Materials and Methods**

### 106 **Sampling**

107 In the context of the URBANGENE project, sampling locations were chosen in the state of  
108 Geneva on the basis of the MARVILLE (<http://campus.hesge.ch/mareurbaine/>) and of the *Centre de*  
109 *coordination pour la protection des amphibiens et des reptiles de Suisse* (<http://www.karch.ch/>) ponds  
110 databases, and also by means of a crowdsourcing campaign to include private ones  
111 (<http://urbangene.heig-vd.ch>). One hundred and fifty ponds were identified and then inspected.  
112 Tadpoles were finally sampled from April 9 to 22, 2015, in a subset of 41 ponds (Figure 1). Sampled  
113 ponds differed in size, species composition, and in the typology of the surrounding environments, some

114 of them being located in close proximity to the densely inhabited Geneva downtown (and placed in  
115 urban parks and private grounds), some others in the more rural Geneva suburbs, characterized by a  
116 higher degree of naturalness. Overall, 375 tadpoles were sampled, with an average of 9.2 samples per  
117 pond (sampling range: 4-15 tadpoles per pond). In order to characterize the whole tadpole population  
118 present in a pond, sampling privileged tadpoles coming from different frogspawn, whenever present;  
119 in such a case, tadpoles were collected shortly after they hatched from their frogspawn to reduce the  
120 chance of sampling siblings.

## 121 **DNA extraction**

### 122 *Sample preparation*

123 After sampling, tadpoles were put individually in a water dish with Tricaine methane  
124 sulphate (MS-222), which caused tadpoles' rapid anaesthesia and decease. The apical part of the tail  
125 was carefully clipped in order to avoid contamination by bacteria from the intestinal tract. After the  
126 freeze-drying of the tails, DNA was extracted at the LGC laboratories in Berlin (Germany), using the  
127 sbeadex<sup>TM</sup> tissue kit (LGC, Teddington, UK), and following the manufacturer's instructions.

### 128 *Pan-Chlamydiales real-time PCR assay*

129 A *Chlamydiales*-specific Real-Time PCR [44] was used to detect and amplify the DNA  
130 fragment from 207 to 215 bp belonging to the *Chlamydiales* 16S rRNA-encoding gene. Quantification  
131 was performed using a plasmidic 10-fold-diluted positive control tested in duplicate. Amplification  
132 reactions were performed in a final volume of 20 µl, containing: (i) iTaq Universal Probes Supermix  
133 with ROX (Bio-Rad, Reinach, Switzerland); (ii) 0.1 µM concentration of primers panCh16F2 (5'-  
134 CCGCCAACACTGGGACT-3') (the underlined bases representing locked nucleic acids) and

135 panCh16R2 (5'-GGAGTTAGCCGGTGCTTCTTTAC-3') (Eurogentec, Seraing, Belgium); (iii) 0.1  $\mu$ M  
136 concentration of probe panCh16S (5'-FAM [6-carboxyfluorescein]-  
137 CTACGGGAGGCTGCAGTCGAGAATC-BHQ1 [black hole quencher 1]-3') (Eurogentec); (iv)  
138 molecular-biology-grade water (Five Prime, Hilden, Germany); (v) 5  $\mu$ l of sample DNA. Amplification  
139 started with an initial step of activation and denaturation at 95°C for 3 min, followed by 40 cycles at  
140 95°C, 67°C and 72°C, each lasting 15 s, and was performed in a StepOne Plus real-time PCR system  
141 (Applied Biosystems, Zug, Switzerland). Samples with a threshold cycle value ( $C_T$ ) <35 were finally  
142 sequenced, as this is the observed limit for amplicon sequencing (Aeby & Greub, unpublished).

#### 143 *DNA sequencing of the PCR-positive samples*

144 According to the manufacturer's instructions, amplicons from positive samples were purified  
145 using the MSB Spin PCRapace (STRATEC Molecular, Berlin, Germany). The sequencing PCR assay  
146 was performed using a BigDye Terminator v1.1 cycle sequencing kit (Applied Biosystems, Zug,  
147 Switzerland), and with specific inner primers panFseq (5'-CCAACACTGGGACTGAGA-3') and  
148 panRseq (5'-GCCGGTGCTTCTTTAC-3'). Amplification was performed after an initial denaturation  
149 step at 96°C for 1 min followed by 25 cycles at 96°C for 10 s and 60°C for 4 min. Purification of the  
150 sequencing PCR products was done using the SigmaSpin Sequencing Reaction Clean-up (Sigma-  
151 Aldrich, Buchs, Switzerland), and the sequencing was performed in a 3130xL genetic analyzer  
152 (Applied Biosystems). Sequences were analysed and blasted using the Geneious software [45,46].

#### 153 **Global spatial autocorrelation**

154 Following taxonomic assignments, tadpoles' infection rates (IRs) were computed for each pond.  
155 A global spatial autocorrelation analysis was then conducted to investigate the presence of clusters or  
156 dissimilarities (i.e. the existence of spatial groups with similar IRs values, or, on the contrary, the

157 tendency of similar values to stay far away in space), under the null expectation of a random spatial  
158 distribution of infection. Moran Scatter plots [47,48] were then constructed testing different weighting  
159 criteria (in particular, using the mean IR from the first two, four, six, eight and ten nearest ponds,  
160 respectively), and Moran's I [49] was estimated in each weighting scenario as the slope of the linear  
161 regression between weighted and observed IRs. Both observed and weighted IRs were centred prior to  
162 the analysis. Under the null hypothesis ( $h_0$ ) of a Moran's I equal to zero and a significance threshold ( $\alpha$ )  
163 set to 0.05, statistical significance of observed Moran's I was derived by permuting IRs over the  
164 landscape for 9999 times, re-estimating Moran's I in each permutation, deriving a Moran's I reference  
165 distribution, and computing the pseudo  $p$ -value associated with the observed Moran's I in each  
166 weighting scenario. Analysis was performed using a self-made script written in the R programming  
167 language [50,51].

## 168 **Human population density around ponds**

169 The number of inhabitants residing within 1 km radius from each pond (surface:  $\sim 3.14 \text{ km}^2$ )  
170 was derived from the Federal Statistical Office database for the Republic and Canton of Geneva  
171 ([www.bfs.admin.ch](http://www.bfs.admin.ch); see Table 1), and for the year 2013. To test for the existence of a spatial  
172 relationship between human and CLOs occurrence, the Pearson's product moment correlation  
173 coefficient ( $r$ ) was estimated between the number of inhabitants and the observed IRs, and a correlation  
174 test ( $h_0: r=0; \alpha=0.05$ ) was performed through the function `cor.test` as implemented in the `stats` R  
175 package [50]. Ponds 1, 32, 40 and 42 were discarded from analysis given partial information about the  
176 number of inhabitants in the surrounding area.



## 177 **Group comparison analysis**

178           Thirty-two categories describing land cover were derived from the territorial information  
179 system in Geneva (SITG) database ([http://ge.ch/sitg/sitg\\_catalog/geodataid/1133](http://ge.ch/sitg/sitg_catalog/geodataid/1133)) at a 10 m resolution.  
180 Proportions of each land cover category were then computed around the sampling sites as a function of  
181 a selected radius (i.e. buffer). In particular, buffers from 20 m up to 3 km (total: 299) were tested, and  
182 the R function `extract` [52] was used to extrapolate the land cover categories from the buffer circles.

183           To group ponds with similar characteristics, hierarchical clustering was performed on the  
184 resulting land cover proportions with the R function `hclust` [50], by relying on the “average”,  
185 “complete”, “single”, “Ward1” and “Ward2” clustering methods [53,54]. The Silhouette method [55]  
186 was used to identify the optimal number of clusters, as well as the ponds’ membership within the  
187 groups.

188           When two groups of ponds were identified, independent t-tests or Wilcoxon rank sum tests  
189 were run with the R functions `t.test` and `wilcox.test`, respectively; on the contrary, one-way  
190 ANOVAs or Kruskal-Wallis rank sum tests were performed with `aov` or `kruskal.test` [50] in the  
191 presence of more than two clusters. Test choice was driven by firstly checking IRs for normality and  
192 homoscedasticity. *P*-values from the analyses performed with the same cluster method were corrected  
193 for multiple testing with the “Benjamini-Hochberg” (BH) method through `p.adjust` [50]. Buffer  
194 scenarios with at least one group composed by a single pond were discarded given impossibility of  
195 assessing normality.

## 196 **Beta regression models**

197           Association between land cover and IRs was also investigated through univariate beta  
198 regression models [56]. To ease interpretation of regression coefficients ( $\beta$ ), previously obtained land

199 cover proportions were aggregated into five classes prior to analysis (Supplementary Table 1):  
200 “Managed vegetation”, accounting for human-managed green areas; “Vegetation near water”, referring  
201 to species communities well-adapted to live into/or in close proximity with water surfaces; “Forests”,  
202 grouping forest species; “Urban environment”, encompassing highly urbanized areas; and “Open  
203 fields”, enclosing natural vegetation different from forests. Association tests ( $h_0: \beta=0; \alpha=0.05$ ) were  
204 then performed separately for each class, and for each buffer used. The function `betareg` [56] was  
205 used to perform the tests, and observed IRs were transformed prior to the analyses to account for the  
206 presence of extreme values (zeros and ones) [57]. As before,  $p$ -values from the tests involving the same  
207 aggregated land cover class were corrected for multiple testing with the BH method.

## 208 **Results**

209 We found 145 tadpoles (i.e. 38.7% of the samples) positive for the presence of *Chlamydiales*  
210 infection. Positive samples occurred across 36 sampling sites (i.e. 87.8% of the ponds sampled), with 5  
211 ponds (12.2%) displaying no evidence of *Chlamydiales* occurrence, and infection rates spanning from 0  
212 to 100% (Table 1 and Figure 2). Moran's I analysis indicated the absence of significant spatial  
213 autocorrelation in the observed infection rates, regardless of the weighting scenarios used (Figure 3). In  
214 addition, no significant relationship was observed between human presence and observed IRs  
215 ( $r=-0.145$ ; 95% confidence intervals:  $-0.448, 0.187$ ;  $t=-0.869$ ;  $df=35$ ;  $p$ -value= $0.391$ ), with ponds  
216 displaying  $IR>0.5$  being located in both scarcely and highly populated areas (see ponds 39 and 23 with  
217  $\sim 50$  and  $900$  inhabitants/ $3.14$  km<sup>2</sup>, respectively, and ponds 31 and 17 with  $\sim 6000$  and  $7100$   
218 inhabitants/ $3.14$  km<sup>2</sup>, respectively; Supplementary Figure 1).

219 Only Wilcoxon and Kruskal-Wallis rank sum tests were performed on the groups of ponds  
220 defined with clustering analysis due to non-normality and/or heteroscedasticity. After multiple testing

221 correction, none of the land cover-based group showed any significant difference in IRs (Figure 5).  
222 Likewise, none of the aggregated land cover variable showed a significant association with IRs after  
223 multiple testing correction in the beta regression analysis (Figure 6).

224 Out of the 145 positive samples, 16 presented a  $C_T$  value <35, and were subsequently sequenced  
225 at the 16S ribosomal RNA gene for taxonomic identification. Taxonomic attribution was possible at a  
226 family-level lineage for 13 samples. In particular, six were found to be positive for  
227 *Parachlamydiaceae*, three for *Simkaniaceae* and two for *Criblamydiaceae*. The remaining two samples  
228 were found positive for the family *Thermoanaerobacteriaceae*, genus *Thermoanaerobacter*, which  
229 does not belong to *Chlamydiales*. Among the six samples infected by *Parachlamydiaceae*, one was  
230 positive for the genus *Similichlamydia* (as retrieved from Pond 35), one for the genus *Neochlamydia*  
231 (from pond 3), one for the genus *Protochlamydia* (from Pond 17), and three for the genus  
232 *Parachlamydia* (as observed in pond 30, with two sequences being highly similar with less than 1%  
233 divergence in the 16S rRNA sequence). All the samples infected by *Simkaniaceae* were assigned to the  
234 genus *Simkania* (from ponds 7, 15 and 38, respectively). Finally, samples infected by *Criblamydiaceae*  
235 and positive for *Thermoanaerobacteriaceae* were assigned to the genera *Estrella* and  
236 *Thermoanaerobacter*, respectively, and retrieved from Ponds 23 and 25 (Table 1 and Figure 4). Due to  
237 low sequencing quality, no lineage could be identified for the samples coming from Ponds 1, 34 and  
238 36.

## 239 Discussion

240 The order *Chlamydiales* comprises bacterial agents of important human and animal diseases, as  
241 well as emerging pathogens which affect a broad spectrum of hosts [1,3,26]. To our knowledge, the

242 present study reports the first observation of CLOs infection in tadpoles' populations of the common  
243 toad species *B. bufo*.

244 Notably, among the operational taxonomic units found are CLOs assigned to the genus  
245 *Parachlamydia*, which characterized the microbiome of a Pyrenean midwife toad population unable to  
246 recover from an infection by the highly aggressive fungus *Batrachochytrium dendrobatidis* [25].  
247 Considering co-occurrence of Chlamydiae and *B. dendrobatidis* was also observed in a *X. tropicalis*  
248 population undergoing epizootic disease dynamics [12], an association was proposed between the skin  
249 microbiome of amphibians and *B. dendrobatidis* infection outcome [25]. Given the emerging role of *B.*  
250 *dendrobatidis* in the current global amphibian biodiversity crisis [58], *Parachlamydia* occurrence might  
251 pinpoint a potential vulnerability for the *B. bufo* populations under study which should deserve  
252 attention for conservation.

253 The genera *Simkania* and *Neochlamydia* encompasses recognized emerging pathogens for both  
254 humans and animals. Particularly, *Simkania* species were associated with respiratory deficit in humans  
255 and epitheliocystis in fish, and *Neochlamydia* species with ocular diseases in domestic cat and  
256 epitheliocystis [3]. So far, there is weak evidence about *Estrella* involvement as a human pathogen,  
257 even if this recently discovered bacterial genus is still understudied [59]. Such findings would suggest a  
258 potential role for *B. bufo* as a host reservoir for CLOs, and an ad hoc monitoring program might be  
259 beneficial for both biodiversity conservation and public health purposes. Nevertheless, no evident  
260 relationship seems to exist between observed infection rates and population density in the study area,  
261 even if further studies would be advisable relying on a bigger sample size to obtain more robust  
262 evidences in this regard; furthermore, particular consideration should be accorded to *Le Marais* and  
263 *Étang Hutins* (Pond 17 and Pond 31, respectively) given their combination of high IRs and number of  
264 inhabitants (Supplementary Figure 1).

265 Several studies support the paradigm of microbial biogeography “everything is everywhere, but,  
266 the environment selects” for *Chlamydiales* [1,3,42]. Coherently with such literature statements, the  
267 apparent absence of a clear spatial pattern, together with the rather ubiquitous occurrence of infection  
268 in *B. bufo*, would suggest a cosmopolitan distribution for the vectors and their endosymbionts even at a  
269 local geographical scale (see Figures 2 and 3), thus comforting the expectation “everything is  
270 everywhere”. Nevertheless, our attempt to investigate how “the environment selects” was more tricky,  
271 and no association was found with land cover typologies able to explain the observed CLOs  
272 distribution (see Figures 5 and 6). At this regard, we believe further studies should focus on the  
273 influence of local environmental conditions on *Chlamydiales* occurrence, especially tacking into  
274 consideration alternative variables with proved effects on amoebae distributions (e.g. precipitation,  
275 temperature, moisture, pH and dissolved oxygen) [36–40]. Ideally, the description of CLOs-specific  
276 niches would provide fine-scale predictive distribution maps of *Chlamydiales* and their vectors, with  
277 straightforward applications in both public health preventive strategies, and prioritization of susceptible  
278 animal host populations for conservation.

279 To conclude, the present work candidates the amphibian species *B. bufo* as a new host for  
280 CLOs, provides a first estimate of CLOs infection rate in *B. bufo* tadpole populations from a urban  
281 environment, agrees with literature findings concerned with *Chlamydiales* ubiquitous distribution,  
282 while apparently excluding the land cover as a selective variable for *Chlamydiales* occurrence in the  
283 studied area.

## 284 **Acknowledgments**

285 We warmly thank the residents of the city of Geneva who allowed us to access their private  
286 pond for sampling. The study was funded by the GELBERT Foundation in Geneva, Switzerland

287 (URBANGENE project no 088-2013), by the Grand Genève cross-border metropolitan area, and by the  
288 Direction générale Agriculture & Nature (DGAN) du Département de l'Environnement, des Transports  
289 et de l'Agriculture (DETA) of the State of Geneva, Switzerland.

## 290 **References**

- 291 [1] Horn M. Chlamydiae as Symbionts in Eukaryotes. *Annu Rev Microbiol* 2008;62:113–31.  
292 doi:10.1146/annurev.micro.62.081307.162818.
- 293 [2] Greub G, Raoult D. History of the ADP/ATP-Translocase-Encoding Gene, a Parasitism Gene  
294 Transferred from a Chlamydiales Ancestor to Plants 1 Billion Years Ago. *Appl Environ Microbiol*  
295 2003;69:5530–5. doi:10.1128/AEM.69.9.5530-5535.2003.
- 296 [3] Taylor-Brown A, Vaughan L, Greub G, Timms P, Polkinghorne A. Twenty years of research into  
297 Chlamydia-like organisms: a revolution in our understanding of the biology and pathogenicity of  
298 members of the phylum *Chlamydiae*. *Pathog Dis* 2015;73:1–15. doi:10.1093/femspd/ftu009.
- 299 [4] Pillonel T, Bertelli C, Salamin N, Greub G. Taxogenomics of the order *Chlamydiales*. *Int J Syst*  
300 *Evol Microbiol* 2015;65:1381–93. doi:10.1099/ijls.0.000090.
- 301 [5] Lienard J, Croxatto A, Prod'homme G, Greub G. *Estrella lausannensis*, a new star in the  
302 *Chlamydiales* order. *Microbes Infect* 2011;13:1232–41. doi:10.1016/j.micinf.2011.07.003.
- 303 [6] Borel N, Polkinghorne A, Pospischil A. A Review on Chlamydial Diseases in Animals: Still a  
304 Challenge for Pathologists? *Vet Pathol* 2018;55:374–90. doi:10.1177/0300985817751218.
- 305 [7] Lamoth F, Greub G. Fastidious intracellular bacteria as causal agents of community-acquired  
306 pneumonia. *Expert Rev Anti Infect Ther* 2010;8:775–90.
- 307 [8] Polkinghorne A, Greub G. A new equine and zoonotic threat emerges from an old avian pathogen,  
308 *Chlamydia psittaci*. *Clin Microbiol Infect* 2017;23:693–4.
- 309 [9] Longbottom D, Coulter LJ. Animal Chlamydioses and Zoonotic Implications. *J Comp Pathol*  
310 2003;128:217–44. doi:10.1053/jcpa.2002.0629.
- 311 [10] Horn M, Wagner M. Bacterial Endosymbionts of Free-living Amoebae. *J Eukaryot Microbiol*  
312 2004;51:509–514.
- 313 [11] Blumer C, Zimmermann DR, Weilenmann R, Vaughan L, Pospischil A. Chlamydiae in Free-  
314 Ranging and Captive Frogs in Switzerland. *Vet Pathol* 2007;44:144–50. doi:10.1354/vp.44-2-144.
- 315 [12] Reed K. Chlamydia pneumoniae Infection in a Breeding Colony of African Clawed Frogs  
316 (*Xenopus tropicalis*). *Emerg Infect Dis* 2000;6:196–9. doi:10.3201/eid0602.000216.
- 317 [13] Martel A, Adriaensen C, Sharifian-Fard M, Vandewoestyne M, Deforce D, Favoreel H, et al.  
318 The novel Candidatus *Amphibiichlamydia ranarum* is highly prevalent in invasive exotic bullfrogs  
319 (*Lithobates catesbeianus*): 'Candidatus Amphibiichlamydia ranarum' in bullfrogs. *Environ*  
320 *Microbiol Rep* 2013;5:105–8. doi:10.1111/j.1758-2229.2012.00359.x.

- 321 [14] Greub G. *Parachlamydia acanthamoebae*, an emerging agent of pneumonia. Clin Microbiol  
322 Infect 2009;15:18–28. doi:10.1111/j.1469-0691.2008.02633.x.
- 323 [15] Baud D, Goy G, Osterheld M-C, Croxatto A, Borel N, Vial Y, et al. Role of *Waddlia*  
324 *chondrophila* Placental Infection in Miscarriage. Emerg Infect Dis 2014;20:460–4.  
325 doi:10.3201/eid2003.131019.
- 326 [16] Blumer S, Greub G, Waldvogel A, Hässig M, Thoma R, Tschuor A, et al. *Waddlia*,  
327 *Parachlamydia* and *Chlamydiaceae* in bovine abortion. Vet Microbiol 2011;152:385–93.  
328 doi:10.1016/j.vetmic.2011.05.024.
- 329 [17] Henning K. *Neospora caninum* and *Waddlia chondrophila* strain 2032/99 in a septic stillborn  
330 calf. Vet Microbiol 2002;85:285–92. doi:10.1016/S0378-1135(01)00510-7.
- 331 [18] Ammerdorffer A, Stojanov M, Greub G, Baud D. Chlamydia trachomatis and chlamydia-like  
332 bacteria: new enemies of human pregnancies. Curr Opin Infect Dis 2017;30:289–96.
- 333 [19] Wheelhouse N, Longbottom D, Willoughby K. Chlamydia in cases of cattle pneumonia in  
334 Scotland. Vet Rec 2013;172:110–110.
- 335 [20] Friedman MG. Detection of *Simkania negevensis* by culture, PCR, and serology in respiratory  
336 tract infection in Cornwall, UK. J Clin Pathol 2006;59:331–3. doi:10.1136/jcp.2004.025601.
- 337 [21] Lamoth F, Jatou K, Vaudaux B, Greub G. *Parachlamydia* and *Rhabdochlamydia*: Emerging  
338 Agents of Community-Acquired Respiratory Infections in Children. Clin Infect Dis 2011;53:500–1.  
339 doi:10.1093/cid/cir420.
- 340 [22] Niemi S, Greub G, Puolakkainen M. Chlamydia-related bacteria in respiratory samples in  
341 Finland. Microbes Infect 2011;13:824–7. doi:10.1016/j.micinf.2011.04.012.
- 342 [23] von Bomhard W, Polkinghorne A, Lu Z, Vaughan L, Vöggtlin A, Zimmermann D, et al.  
343 Detection of novel chlamydiae in cats with ocular disease. Am J Vet Res 2003.
- 344 [24] Soldati G, Lu ZH, Vaughan L, Polkinghorne A, Zimmermann DR, Huder JB, et al. Detection of  
345 Mycobacteria and Chlamydiae in Granulomatous Inflammation of Reptiles: A Retrospective Study.  
346 Vet Pathol 2004;41:388–97. doi:10.1354/vp.41-4-388.
- 347 [25] Bates KA, Clare FC, O’Hanlon S, Bosch J, Brookes L, Hopkins K, et al. Amphibian  
348 chytridiomycosis outbreak dynamics are linked with host skin bacterial community structure. Nat  
349 Commun 2018;9. doi:10.1038/s41467-018-02967-w.
- 350 [26] Borel N, Polkinghorne A, Pospischil A. A Review on Chlamydial Diseases in Animals: Still a  
351 Challenge for Pathologists? Vet Pathol 2018;55:374–90. doi:10.1177/0300985817751218.
- 352 [27] Taylor-Brown A, Pillionel T, Bridle A, Qi W, Bachmann NL, Miller TL, et al. Culture-  
353 independent genomics of a novel chlamydial pathogen of fish provides new insight into host-  
354 specific adaptations utilized by these intracellular bacteria: Novel chlamydial epitheliocystis agent  
355 in grouper. Environ Microbiol 2017;19:1899–913. doi:10.1111/1462-2920.13694.
- 356 [28] Corsaro D, Feroldi V, Saucedo G, Ribas F, Loret J-F, Greub G. Novel Chlamydiales strains  
357 isolated from a water treatment plant. Environ Microbiol 2009;11:188–200. doi:10.1111/j.1462-  
358 2920.2008.01752.x.

- 359 [29] Schmitz-Esser S, Toenshoff ER, Haider S, Heinz E, Hoenninger VM, Wagner M, et al.  
360 Diversity of Bacterial Endosymbionts of Environmental Acanthamoeba Isolates. *Appl Environ*  
361 *Microbiol* 2008;74:5822–31. doi:10.1128/AEM.01093-08.
- 362 [30] Michel R, Müller K-D, Hoffmann R. Enlarged Chlamydia-like organisms as spontaneous  
363 infection of *Acanthamoeba castellanii*. *Parasitol Res* 2001;87:248–51.  
364 doi:10.1007/s004360000318.
- 365 [31] Thomas V, Casson N, Greub G. *Criblamydia sequanensis*, a new intracellular *Chlamydiales*  
366 isolated from Seine river water using amoebal co-culture. *Environ Microbiol* 2006;8:2125–35.  
367 doi:10.1111/j.1462-2920.2006.01094.x.
- 368 [32] Barker J, Brown MRW. Trojan Horses of the microbial world: protozoa and the survival of  
369 bacterial pathogens in the environment. *Microbiology* 1994;140:1253–9. doi:10.1099/00221287-  
370 140-6-1253.
- 371 [33] Pilloux L, Aeby S, Gäumann R, Burri C, Beuret C, Greub G. The High Prevalence and  
372 Diversity of Chlamydiales DNA within Ixodes ricinus Ticks Suggest a Role for Ticks as Reservoirs  
373 and Vectors of Chlamydia-Related Bacteria. *Appl Environ Microbiol* 2015;81:8177–82.  
374 doi:10.1128/AEM.02183-15.
- 375 [34] Glime JM. Protozoa Ecology. Chapt. 2-6. In: Glime, J. M. Bryophyte Ecology. Bryological  
376 Interaction. vol. 2. n.d.
- 377 [35] Smith HG, Wilkinson DM. Not all free-living microorganisms have cosmopolitan distributions  
378 - the case of *Nebela (Apodera) vas* Certes (Protozoa: Amoebozoa: Arcellinida). *J Biogeogr*  
379 2007;34:1822–31. doi:10.1111/j.1365-2699.2007.01733.x.
- 380 [36] Aguilar M, Fiore-Donno A-M, Lado C, Cavalier-Smith T. Using environmental niche models to  
381 test the ‘everything is everywhere’ hypothesis for *Badhamia*. *ISME J* 2014;8:737–45.  
382 doi:10.1038/ismej.2013.183.
- 383 [37] Aguilar M, Lado C. Ecological niche models reveal the importance of climate variability for the  
384 biogeography of protosteloid amoebae. *ISME J* 2012;6:1506–14. doi:10.1038/ismej.2012.12.
- 385 [38] Mieczan T, Adamczuk M. Ecology of testate amoebae (Protists) in mosses: distribution and  
386 relation of species assemblages with environmental parameters (King George Island, Antarctica).  
387 *Polar Biol* 2015;38:221–30. doi:10.1007/s00300-014-1580-0.
- 388 [39] Bobrov AA, Charman DJ, Warner BG. Ecology of Testate Amoebae (Protozoa: Rhizopoda) on  
389 Peatlands in Western Russia with Special Attention to Niche Separation in Closely Related Taxa.  
390 *Protist* 1999;150:125–36. doi:10.1016/S1434-4610(99)70016-7.
- 391 [40] Barry G. Warner, Taro Asada, Noel P. Quinn. Seasonal Influences on the Ecology of Testate  
392 Amoebae (Protozoa) in a Small *Sphagnum* Peatland in Southern Ontario, Canada. *Microb Ecol*  
393 2007;54:91–100.
- 394 [41] Garcia-Porta J, Litvinchuk SN, Crochet PA, Romano A, Geniez PH, Lo-Valvo M, et al.  
395 Molecular phylogenetics and historical biogeography of the west-palaearctic common toads (*Bufo*  
396 *bufo* species complex). *Mol Phylogenet Evol* 2012;63:113–30. doi:10.1016/j.ympev.2011.12.019.



- 397 [42] de Wit R, Bouvier T. “Everything is everywhere, but, the environment selects”; what did Baas  
398 Becking and Beijerinck really say? *Environ Microbiol* 2006;8:755–8. doi:10.1111/j.1462-  
399 2920.2006.01017.x.
- 400 [43] Greub G, Boyadjiev I, Scola B, Raoult D, Martin C. Serological Hint Suggesting That  
401 *Parachlamydiaceae* Are Agents of Pneumonia in Polytraumatized Intensive Care Patients. *Ann N*  
402 *Y Acad Sci* 2003;990:311–9. doi:10.1111/j.1749-6632.2003.tb07381.x.
- 403 [44] Lienard J, Croxatto A, Aeby S, Jatou K, Posfay-Barbe K, Gervaix A, et al. Development of a  
404 New Chlamydiales-Specific Real-Time PCR and Its Application to Respiratory Clinical Samples. *J*  
405 *Clin Microbiol* 2011;49:2637–42. doi:10.1128/JCM.00114-11.
- 406 [45] Kearse M, Moir R, Wilson A, Stones-Havas S, Cheung M, Sturrock S, et al. Geneious Basic:  
407 An integrated and extendable desktop software platform for the organization and analysis of  
408 sequence data. *Bioinformatics* 2012;28:1647–9. doi:10.1093/bioinformatics/bts199.
- 409 [46] Widmer I, Rochat E, Duruz S, Aeby S, Selmoni O, Vajana E, et al. Chlamydia-like organisms  
410 in *Bufo bufo* tadpoles from ponds located in the Geneva metropolitan area  
411 (10.5281/zenodo.1404188). 2018.
- 412 [47] Anselin L. The Moran Scatterplot as an ESDA Tool to Assess Local Instability in Spatial  
413 Association. In *Spatial Analytical Perspectives on GIS in Environmental and Socio-Economic*  
414 *Sciences*. London: Taylor; Francis: Manfred Fischer, Henk Scholten, and David Unwin; 1996.
- 415 [48] Cliff A, Ord JK. *Spatial Autocorrelation*. London: Pion; 1973.
- 416 [49] Moran P. The Interpretation of Statistical Maps. *J R Stat Soc Ser B Methodol* 1948;10.
- 417 [50] R Core Team. R: A language and environment for statistical computing. R Foundation for  
418 Statistical Computing, Vienna, Austria. URL <https://www.R-project.org/> 2015.
- 419 [51] Vajana E, Widmer I, Rochat E, Duruz S, Selmoni O, Vuilleumier S, et al. Chlamydia-like  
420 organisms in *Bufo bufo* tadpoles from ponds located in the Geneva metropolitan area: R scripts  
421 (10.5281/zenodo.1404197). 2018.
- 422 [52] Hijmans RJ. *raster: Geographic Data Analysis and Modeling*. 2016.
- 423 [53] Legendre P, Legendre L. *Numerical Ecology*. 3rd English Ed. Amsterdam: Elsevier Science  
424 BV; 2012.
- 425 [54] Murtagh F, Legendre P. Ward’s Hierarchical Agglomerative Clustering Method: Which  
426 Algorithms Implement Ward’s Criterion? *J Classif* 2014;31:274–95. doi:10.1007/s00357-014-  
427 9161-z.
- 428 [55] Rousseeuw PJ. Silhouettes: A graphical aid to the interpretation and validation of cluster  
429 analysis. *J Comput Appl Math* 1987;20:53–65. doi:10.1016/0377-0427(87)90125-7.
- 430 [56] Cribari-Neto F, Zeileis A. Beta Regression in R. *J Stat Softw* 2010;34.
- 431 [57] Smithson M, Verkuilen J. A better lemon squeezer? Maximum-likelihood regression with beta-  
432 distributed dependent variables. *Psychol Methods* 2006;11:54–71. doi:10.1037/1082-989X.11.1.54.
- 433 [58] Olson DH, Aanensen DM, Ronnenberg KL, Powell CI, Walker SF, Bielby J, et al. Mapping the  
434 Global Emergence of *Batrachochytrium dendrobatidis*, the Amphibian Chytrid Fungus. *PLoS ONE*  
435 2013;8:e56802. doi:10.1371/journal.pone.0056802.

- 436 [59] de Barsey M, Bottinelli L, Greub G. Antibiotic susceptibility of *Estrella lausannensis*, a potential  
437 emerging pathogen. *Microbes Infect* 2014;16:746–54. doi:10.1016/j.micinf.2014.08.003.  
438

439 **Tables**

440 **Table 1.** Information is reported for each pond including: experimental and actual name (Pond ID and Pond name, respectively),  
 441 corresponding municipality, geographical coordinates, number of inhabitants (Nr. inh.s) within 1 km radius, number of *B. bufo*  
 442 tadpoles sampled (N), number of CLOs-positive samples (P), observed infection rates (IR), and *Chlamydiales* taxonomic  
 443 assignments at the genus-level.

| Pond ID | Pond name                              | Municipality    | Lon. | Lat.  | Nr. inh.s | N  | P                  | IR    | Genus                 |
|---------|----------------------------------------|-----------------|------|-------|-----------|----|--------------------|-------|-----------------------|
| 1       | Étang de l'ancien château de St-Victor | Avully          | 5.98 | 46.17 | 394*      | 10 | 6 (1) <sup>a</sup> | 0.600 | ? <sup>b</sup>        |
| 2       | Étang de la pépinière Jacquet          | Satigny         | 6.05 | 46.22 | 107       | 13 | 4                  | 0.308 |                       |
| 3       | Étang du signal de Bernex              | Bernex          | 6.07 | 46.17 | 2038      | 12 | 3 (1)              | 0.250 | <i>Neochlamydia</i>   |
| 4       | Grand Etang des Mouilles               | Bernex          | 6.08 | 46.19 | 149       | 10 | 4                  | 0.400 |                       |
| 5       | Étang des Evaux                        | Confignon       | 6.09 | 46.19 | 1441      | 10 | 9                  | 0.900 |                       |
| 6       | Étang de la ferme Lignon (PAF)         | Vernier         | 6.09 | 46.21 | 2725      | 12 | 2                  | 0.167 |                       |
| 7       | Étang Autrichien                       | Onex            | 6.11 | 46.18 | 4750      | 10 | 2 (1)              | 0.200 | <i>Simkania</i>       |
| 8       | Bassin du Parc Louis Bertrand          | Lancy           | 6.12 | 46.19 | 6340      | 4  | 0                  | 0.000 |                       |
| 9       | Étang Zimmermann                       | Lancy           | 6.12 | 46.19 | 5740      | 5  | 0                  | 0.000 |                       |
| 10      | Étang Perfetta                         | Lancy           | 6.12 | 46.19 | 5829      | 4  | 1                  | 0.250 |                       |
| 11      | Étang Lescaze                          | Genève          | 6.12 | 46.2  | 6393      | 10 | 3                  | 0.300 |                       |
| 12      | Bassin du cimetière de St Georges      | Genève          | 6.12 | 46.2  | 5963      | 9  | 2                  | 0.222 |                       |
| 13      | Étang Spring                           | Lancy           | 6.12 | 46.19 | 5048      | 10 | 0                  | 0.000 |                       |
| 14      | Bassin du Parc Chuit                   | Lancy           | 6.12 | 46.19 | 4609      | 10 | 4                  | 0.400 |                       |
| 15      | Étang du Pré-d'œufeuf                  | Plan-les-Ouates | 6.14 | 46.16 | 1574      | 10 | 6 (1)              | 0.600 | <i>Simkania</i>       |
| 16      | Étang Pinchat                          | Carouge         | 6.15 | 46.18 | 7000      | 15 | 2                  | 0.133 |                       |
| 17      | Le Marais                              | Grand-Saconnex  | 6.11 | 46.23 | 7116      | 15 | 10 (1)             | 0.667 | <i>Protochlamydia</i> |
| 18      | Étang du chemin des Prjins             | Grand-Saconnex  | 6.12 | 46.23 | 3635      | 7  | 4                  | 0.571 |                       |

|    |                                      |                 |      |       |                   |    |        |       |                                               |
|----|--------------------------------------|-----------------|------|-------|-------------------|----|--------|-------|-----------------------------------------------|
| 19 | Bassin du château de Penthes         | Pregny-Chambésy | 6.14 | 46.23 | 467               | 5  | 0      | 0.000 |                                               |
| 20 | Étang Berthier                       | Pregny-Chambésy | 6.15 | 46.23 | 380               | 7  | 0      | 0.000 |                                               |
| 21 | Étang du Jardin Botanique 2 (Serres) | Genève          | 6.15 | 46.23 | 2137              | 10 | 6      | 0.600 |                                               |
| 22 | Étang du jardin botanique            | Genève          | 6.15 | 46.23 | 2336              | 9  | 2      | 0.222 |                                               |
| 23 | Étang Vieux-Clos                     | Chêne-Bougeries | 6.18 | 46.18 | 911               | 12 | 10 (2) | 0.833 | <i>Estrella;</i><br><i>Thermoanaerobacter</i> |
| 24 | Étang Flory                          | Chêne-Bougeries | 6.18 | 46.19 | 946               | 7  | 1      | 0.143 |                                               |
| 25 | Bassin Waldvogel                     | Chêne-Bougeries | 6.18 | 46.19 | 2560              | 6  | 5 (2)  | 0.833 | <i>Estrella;</i><br><i>Thermoanaerobacter</i> |
| 26 | Bassin de la Station de Zoologie     | Chêne-Bougeries | 6.18 | 46.19 | 2641              | 11 | 2      | 0.182 |                                               |
| 27 | Étang Richard                        | Chêne-Bougeries | 6.18 | 46.19 | 1345              | 5  | 5      | 1.000 |                                               |
| 28 | Étang Paradis Haake                  | Chêne-Bougeries | 6.18 | 46.2  | 4661              | 8  | 2      | 0.250 |                                               |
| 29 | Étang route de Chêne                 | Chêne-Bougeries | 6.19 | 46.2  | 4342              | 8  | 1      | 0.125 |                                               |
| 30 | Étang Broud                          | Chêne-Bougeries | 6.19 | 46.2  | 3161              | 10 | 7 (3)  | 0.700 | <i>Parachlamydia</i>                          |
| 31 | Étang Hutins                         | Chêne-Bourg     | 6.2  | 46.2  | 6043              | 8  | 7      | 0.875 |                                               |
| 32 | Étang Loutan                         | Thônex          | 6.2  | 46.2  | 6349 <sup>*</sup> | 6  | 1      | 0.167 |                                               |
| 33 | Étang de la clinique Bel-Air         | Thônex          | 6.21 | 46.21 | 1543              | 9  | 1      | 0.111 |                                               |
| 34 | Étang de Miolan                      | Choulex         | 6.21 | 46.23 | 318               | 8  | 2 (1)  | 0.250 | ?                                             |
| 35 | Bassin du Centre horticole Lullier 2 | Jussy           | 6.25 | 46.23 | 216               | 8  | 4 (1)  | 0.500 | <i>Similichlamydia</i>                        |
| 36 | Étang des Dolliets                   | Jussy           | 6.28 | 46.23 | 23                | 12 | 6 (1)  | 0.500 | ?                                             |
| 37 | Bois du Faisan amont                 | Versoix         | 6.15 | 46.28 | 436               | 10 | 1      | 0.100 |                                               |
| 38 | Étang Bon-séjour                     | Versoix         | 6.16 | 46.28 | 3396              | 10 | 5 (1)  | 0.500 | <i>Simkania</i>                               |
| 39 | Étang des Douves                     | Versoix         | 6.14 | 46.29 | 51                | 12 | 7      | 0.583 |                                               |
| 40 | Étang Est Pré-Béroux                 | Versoix         | 6.14 | 46.3  | 3 <sup>*</sup>    | 6  | 4      | 0.667 |                                               |
| 41 | Étang de Combes-Chapuis              | Versoix         | 6.12 | 46.3  | 13 <sup>*</sup>   | 12 | 4      | 0.333 |                                               |

444 <sup>a</sup>In brackets are the number of samples (among the positive ones) for which a sequence attributable to *Chlamydiales* was obtained.

445 <sup>b</sup>Question marks highlight unsolved taxonomic assignments in the samples for which a sequence attributable to *Chlamydiales* was

446 obtained. \*The reported number of inhabitants can be partial when the pond is located either close to the French or to the Canton of  
447 Vaud border (see Figure 1), for which demographic information was not considered.

448 **Figures**

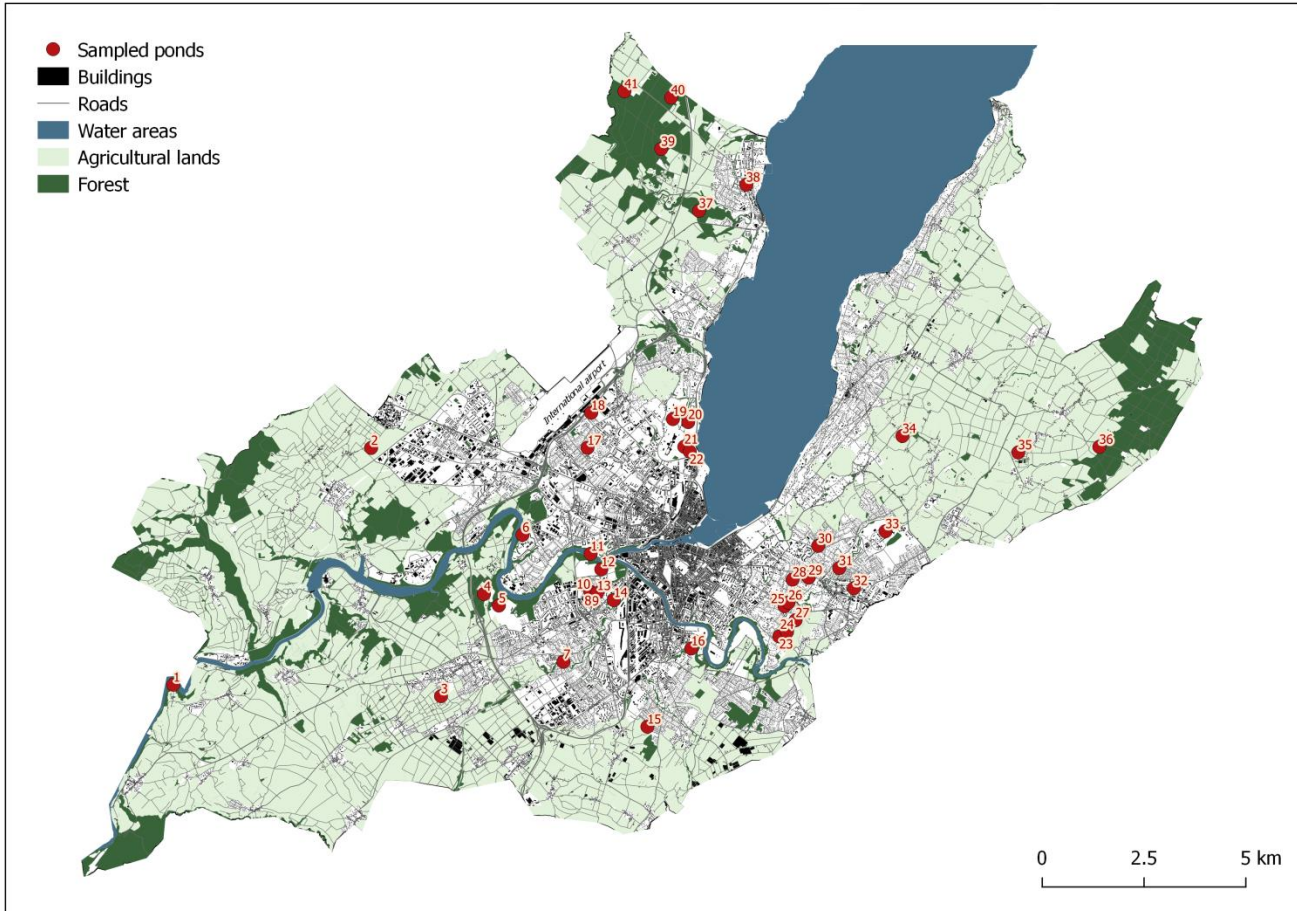

449

450

451

452

**Figure 1.** Spatial representation of the sampled ponds. Ponds are represented in red, with numbers corresponding to Pond IDs in Table 1. Background contextual information represents Geneva metropolitan area, and highlights forests, agricultural, water, as well as urbanized areas.

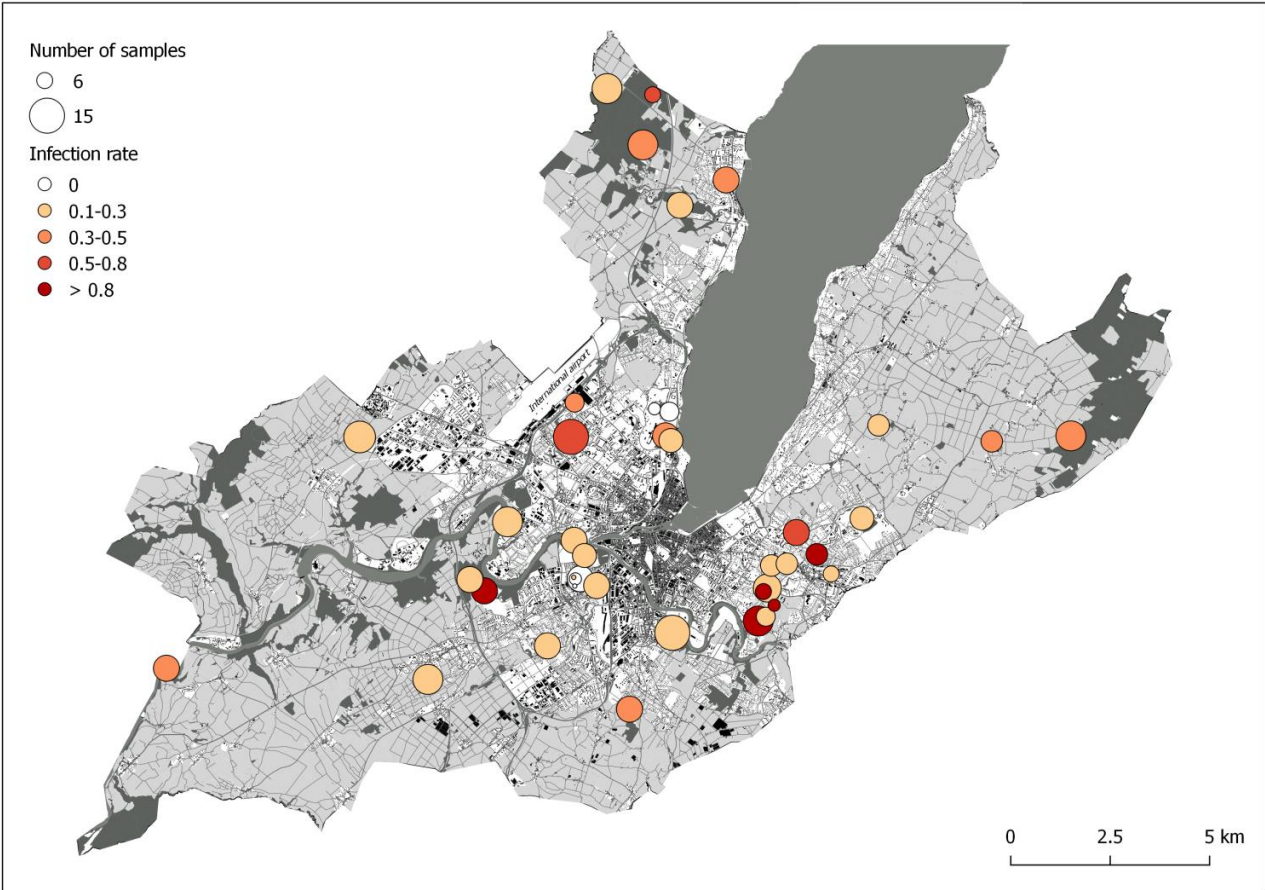

453

454 **Figure 2.** Observed infection rates over the Geneva metropolitan area. The circles represent  
455 sampling sites (see Figure 1), with size proportional to the number of tadpoles sampled, and hue  
456 intensity following the gradient in the observed infection rates.

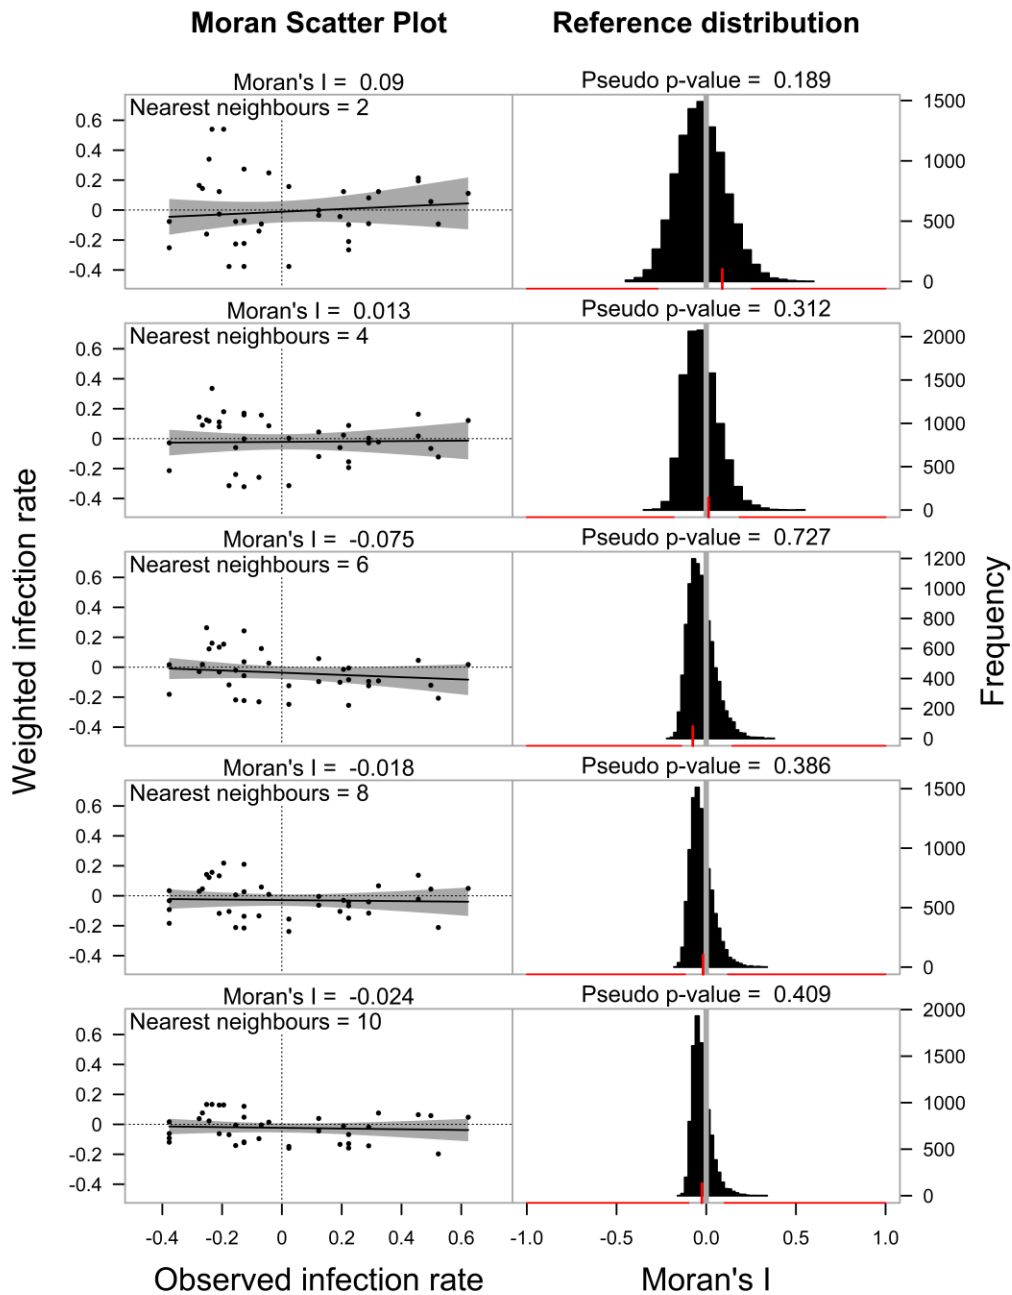

457

458 **Figure 3.** Global autocorrelation analysis results. Left column reports the Moran Scatter Plots obtained  
459 using the first two, four, six, eight and ten nearest neighbours (i.e. ponds), respectively. Right column  
460 reports the Moran's I reference distributions as obtained for each weighting scenario by permutation  
461 tests. The red vertical tick highlights the position of the observed Moran's I in the reference  
462 distribution; a grey vertical line is drawn to show  $I=0$  (i.e. the null hypothesis). Red horizontal lines  
463 pinpoint percentiles 2.5 and 97.5 of the reference distributions, underlining the range of significant I  
464 values.



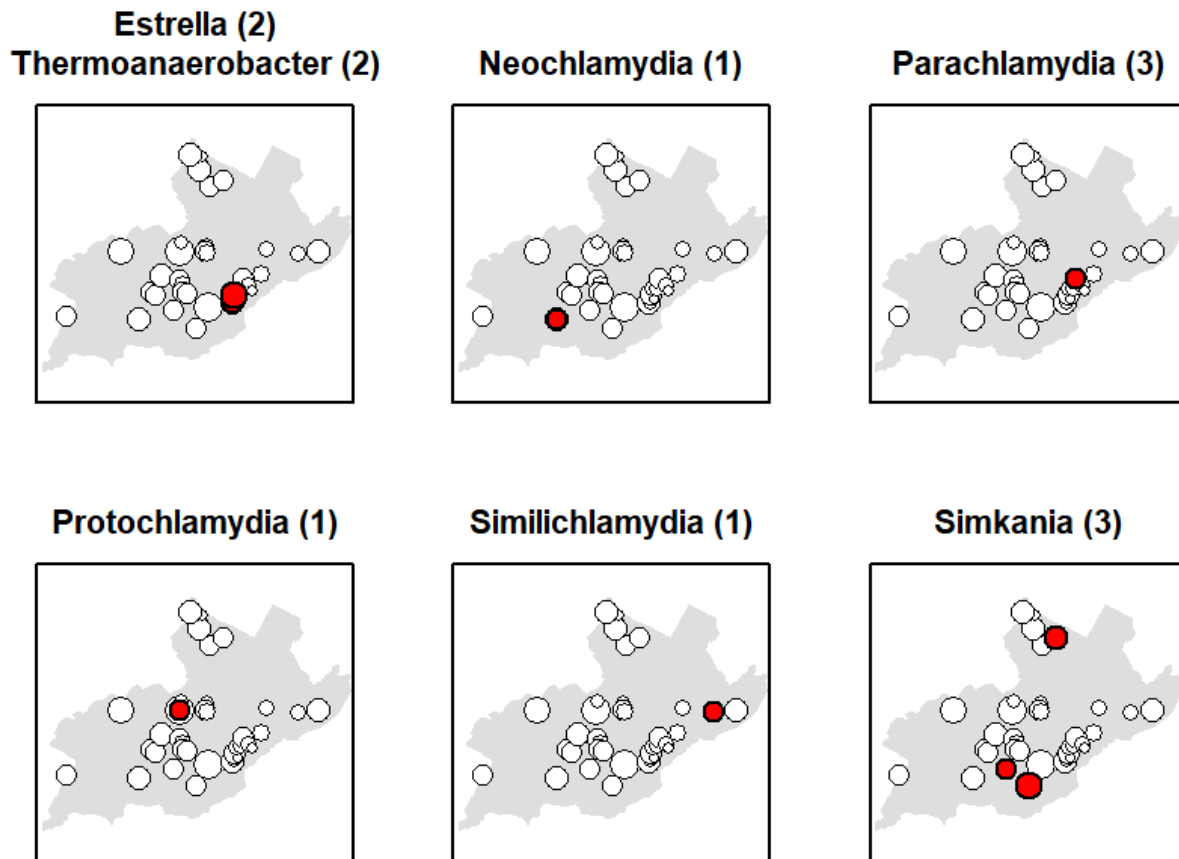

465

466 **Figure 4.** Spatial occurrence of the observed CLOs and *Thermoanaerobacteriaceae* genera is  
467 highlighted by red circles. The number of infected samples (i.e. tadpoles) is reported for each  
468 bacterial genera in brackets (see Table 1), and refers to the highlighted ponds (e.g. three tadpoles  
469 are positive for the genus *Parachlamydia* from the same highlighted pond). The grey area in the  
470 background represents the Geneva metropolitan area, and the size of the circles is proportional to  
471 the number of tadpoles sampled in each sampling site (see Figure 2).

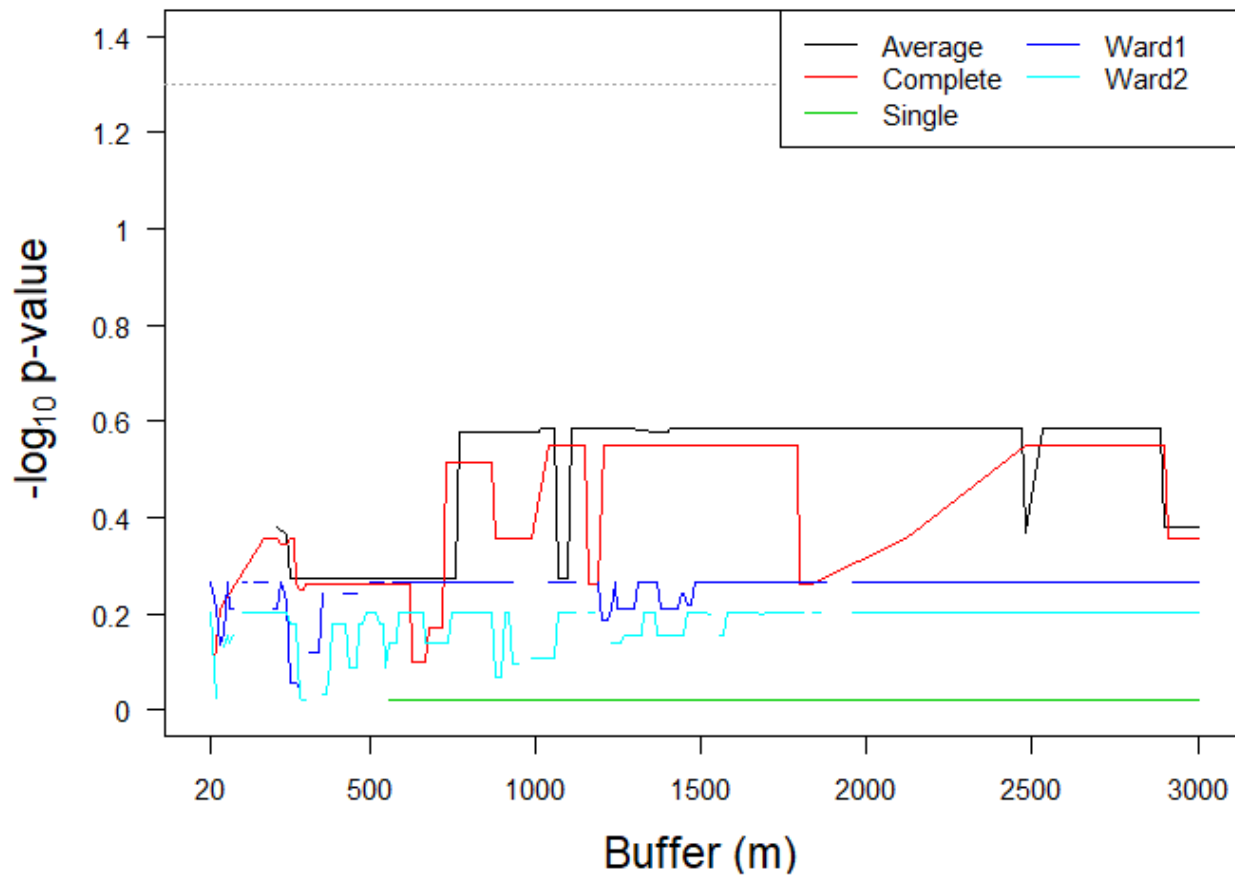

472

473

474

475

476

477

478

**Figure 5.** Results of the group comparison tests. *P*-values are reported on the logarithmic scale, after multiple testing correction, and as a function of both the buffer (i.e. radius) used for characterizing land cover around the sampling sites, and the clustering method used to classify ponds into environmental groups. In the uppermost part of the plot, the dotted line indicates the used significance threshold. Line discontinuities depict tests not run (i.e. where at least one group was constituted by a single pond; refer to main text for explanation).

479

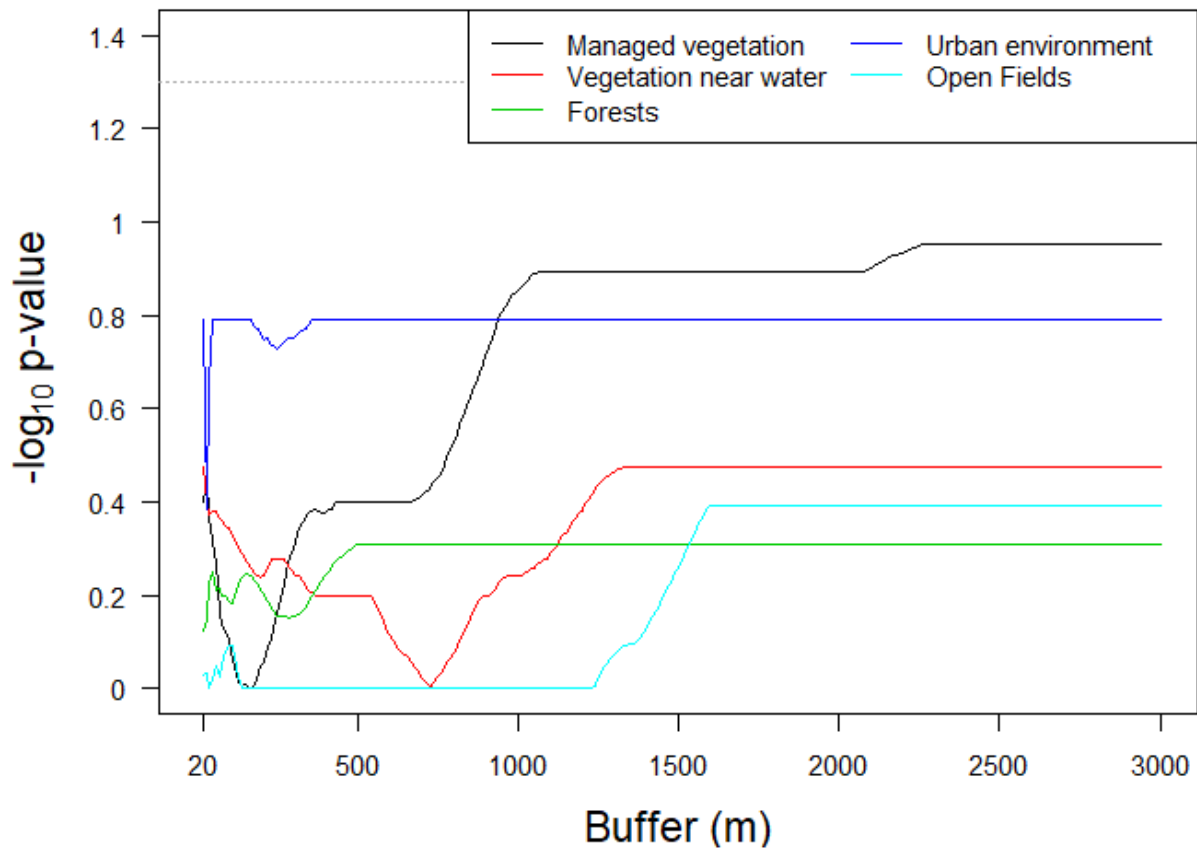

480

481 **Figure 6.** Results of the beta regression analysis. *P*-values associated with the estimated regression  
482 coefficients are reported on the logarithmic scale, after multiple testing correction, and as a function of  
483 both the buffer (i.e. radius) used for characterizing land cover around the sampling sites, and the  
484 aggregated land cover category. In the uppermost part of the plot, the dotted line indicates the used  
485 significance threshold.
